# Supplementary material for: Shape and structural effects of R5-templated Pd nanomaterials as potent catalyst for oxygen electroreduction in alkaline media
Source: Springer Nature journal article supplement (doi:10.1007/s10853-017-1004-y), 2017-03-20
Supplement: MOESM1 [file 12156810]

Supplementary Materials

Shape and Structural Effects of R5 Templated Pd Nanomaterials as Potent Catalyst for Oxygen Electroreduction in Alkaline Media

Hongyu Yang,a Chengwei Wen,b Zhenghua Tang,*,a,c Likai Wang,a Qiannan Wang,a Wei Yan,a Wen Wu,a and Shaowei Chen*,a,d

a New Energy Research Institute, School of Environment and Energy, South China University of Technology, Guangzhou Higher Education Mega Centre, Guangzhou, 510006, P. R. China. Email: [zhht@scut.edu.cn](mailto:zhht@scut.edu.cn)

*b Institute of Nuclear Physics and Chemistry, CAEP, P. O. Box 919-217, Mianyang, Sichuan 621900, China*

c Guangdong Provincial Key Laboratory of Atmospheric Environment and Pollution Control, Guangdong Provincial Engineering and Technology Research Center for Environmental Risk Prevention and Emergency Disposal, School of Environment and Energy, South China University of Technology, Guangzhou Higher Education Mega Center, Guangzhou, 510006, P. R. China.

d Department of Chemistry and Biochemistry, University of California, 1156 High Street, Santa Cruz, California 95064, United States. Email: shaowei@ucsc.edu

**Table S1**. Comparison of number of electron transfer (n) calculated from different methods.

| Samples | n calculated from RRDE | n calculated from K-L plots |
| --- | --- | --- |
| R5-Pd-60 | 3.92-3.95 | 3.92 |
| R5-Pd-90 | 3.94-3.96 | 3.96 |
| R5-Pd-120 | 3.90-3.95 | 3.93 |
| R5-Pd-150 | 3.89-3.95 | 3.91 |


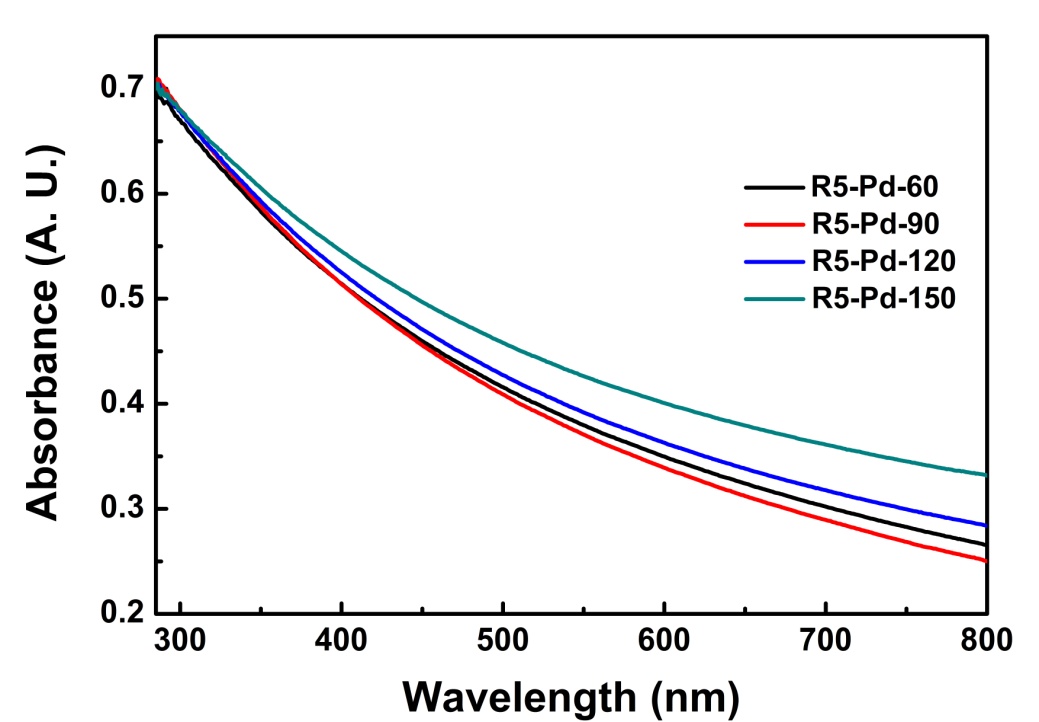


**Figure S1.** UV-visible absorption spectra of the R5 templated Pd nanomaterials.


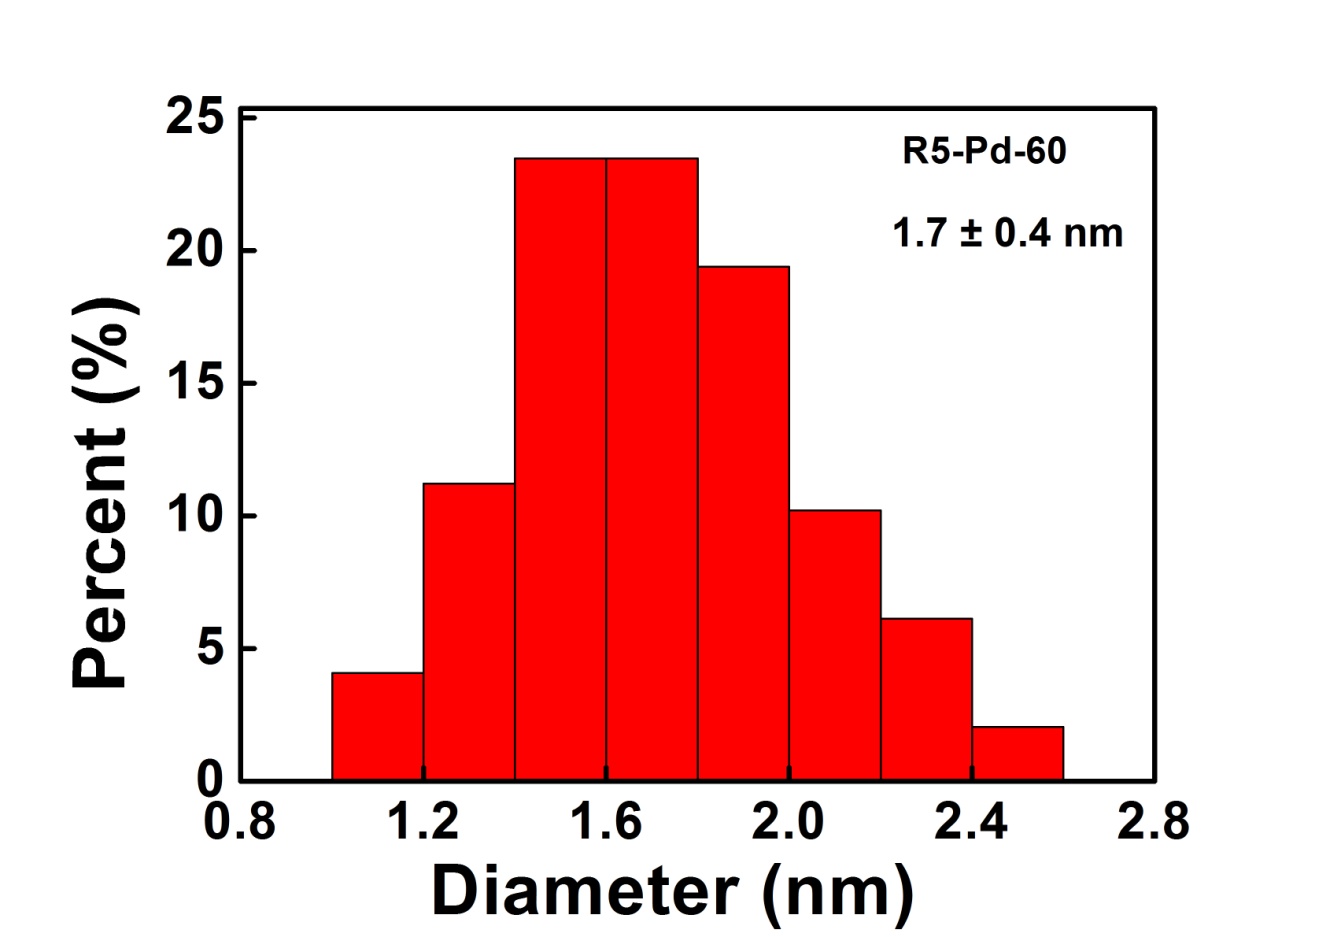


**Figure S2.** The size distribution histogram of R5-Pd-60 nanoparticles (calculated from the HR-TEM results in **Fig. 1**). The average diameter is 1.7 ± 0.4 nm.


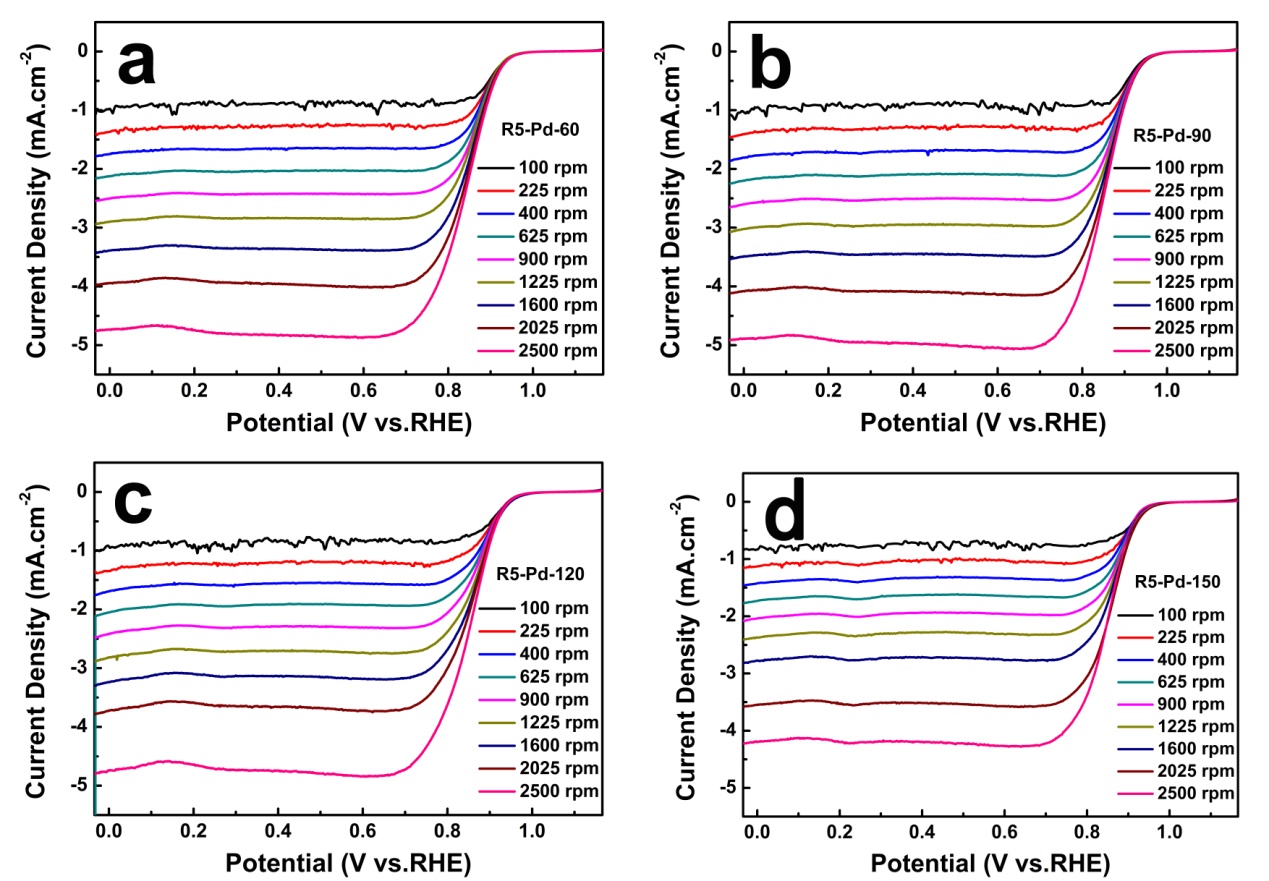
**Figure S3.** LSV curves for (a) R5-Pd-60, (b) R5-Pd-90, (c) R5-Pd-120 and (d) R5-Pd-150 as catalysts at the rotation rates of 100 to 2500 rpm.


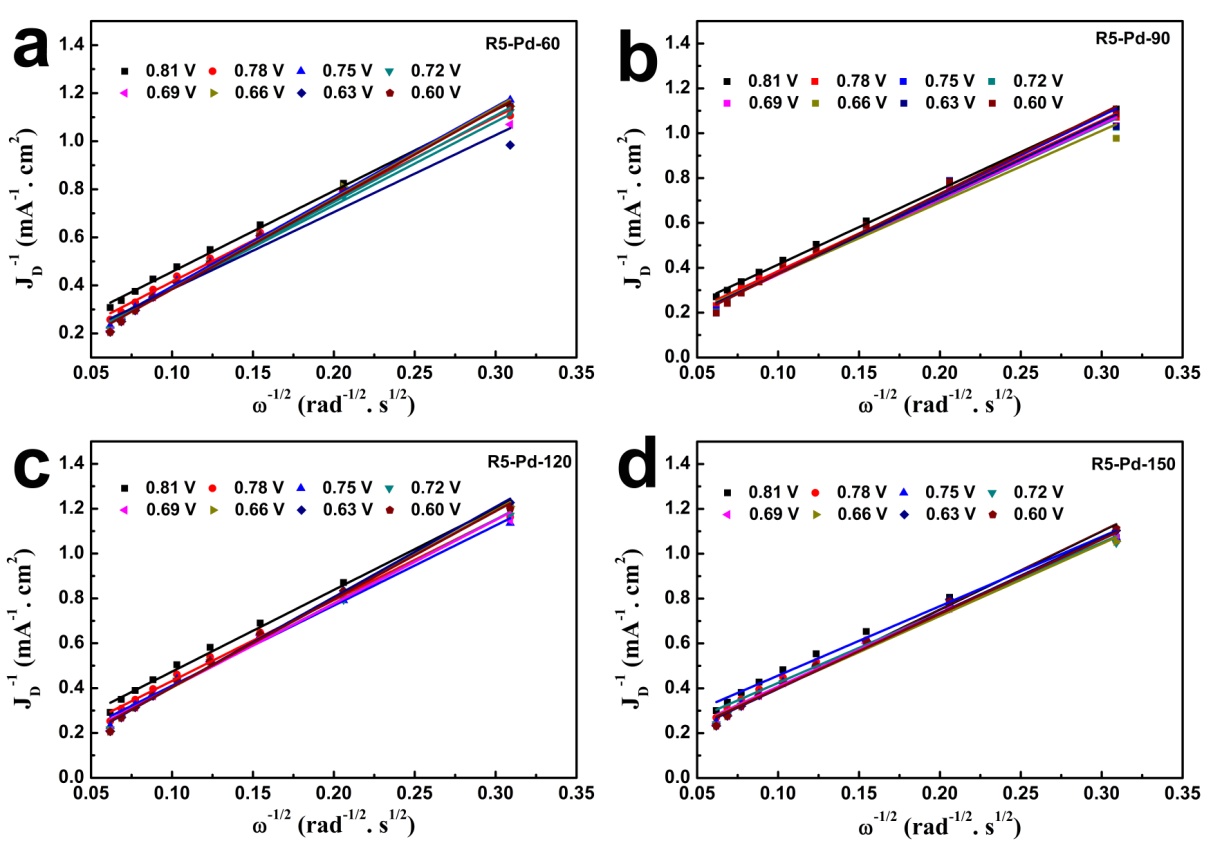


**Figure S4.** The koutecky-levich (K-L) plots for (a) R5-Pd-60, (b) R5-Pd-90, (c) R5-Pd-120 and (d) R5-Pd-150 at different electrode potentials.

**
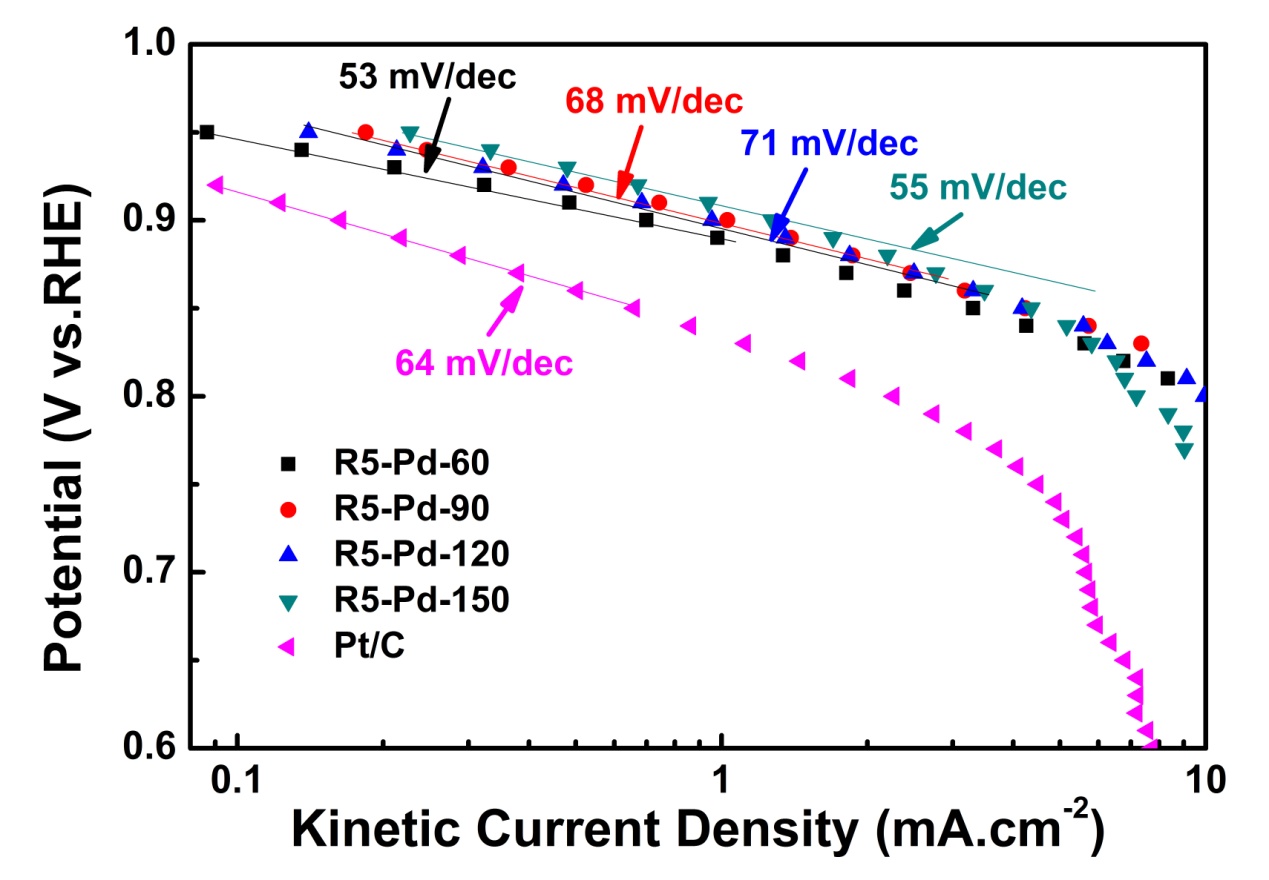
Figure S5.** The Tafel plots for R5-Pd-X samples and commercial Pt/C catalyst.


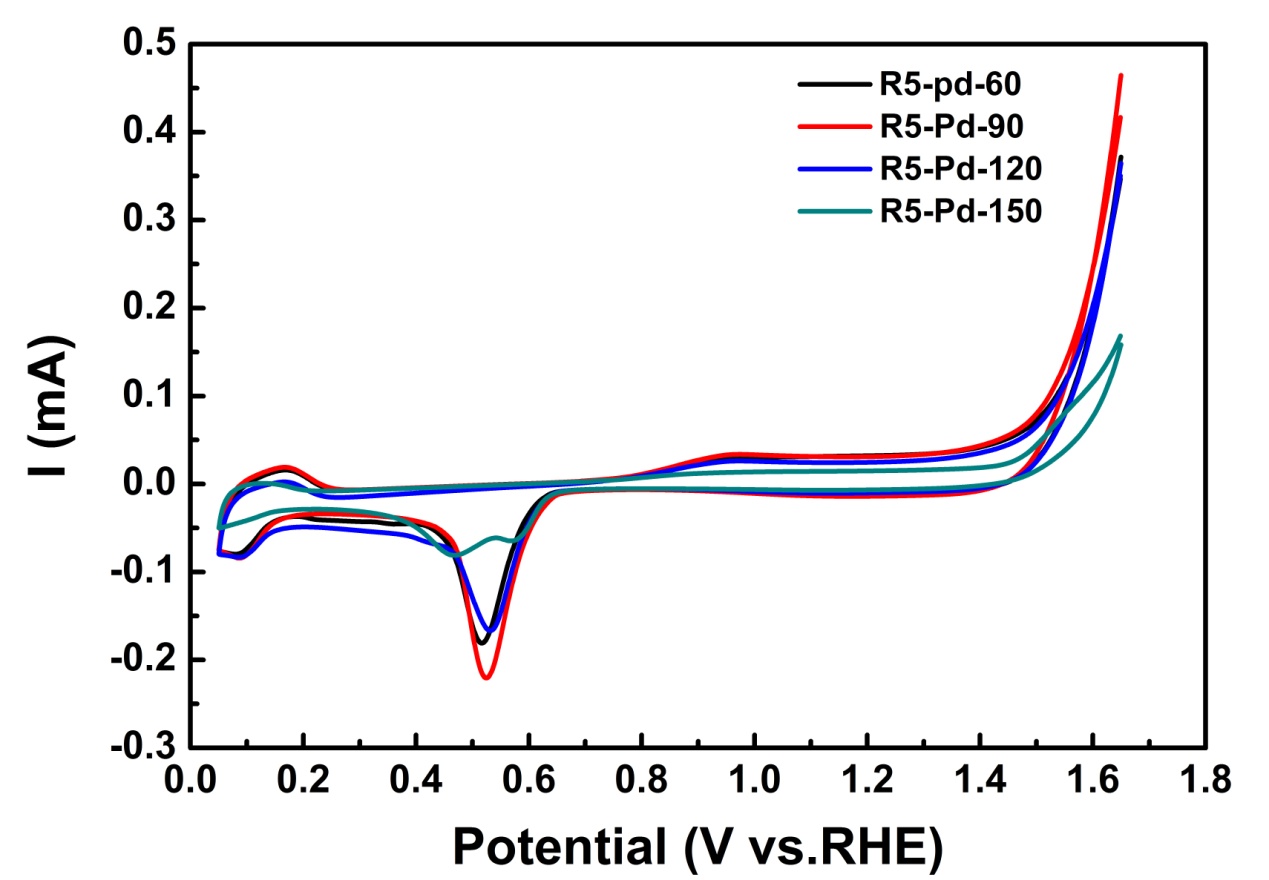


**Figure S6.** Cyclic voltammograms of R5-Pd-60, R5-Pd-90, R5-Pd-120 and R5-Pd-150 electrodes in N2-saturated 0.1 M HClO4 solution at 25 °C (Scan rate, 50 mV/s).


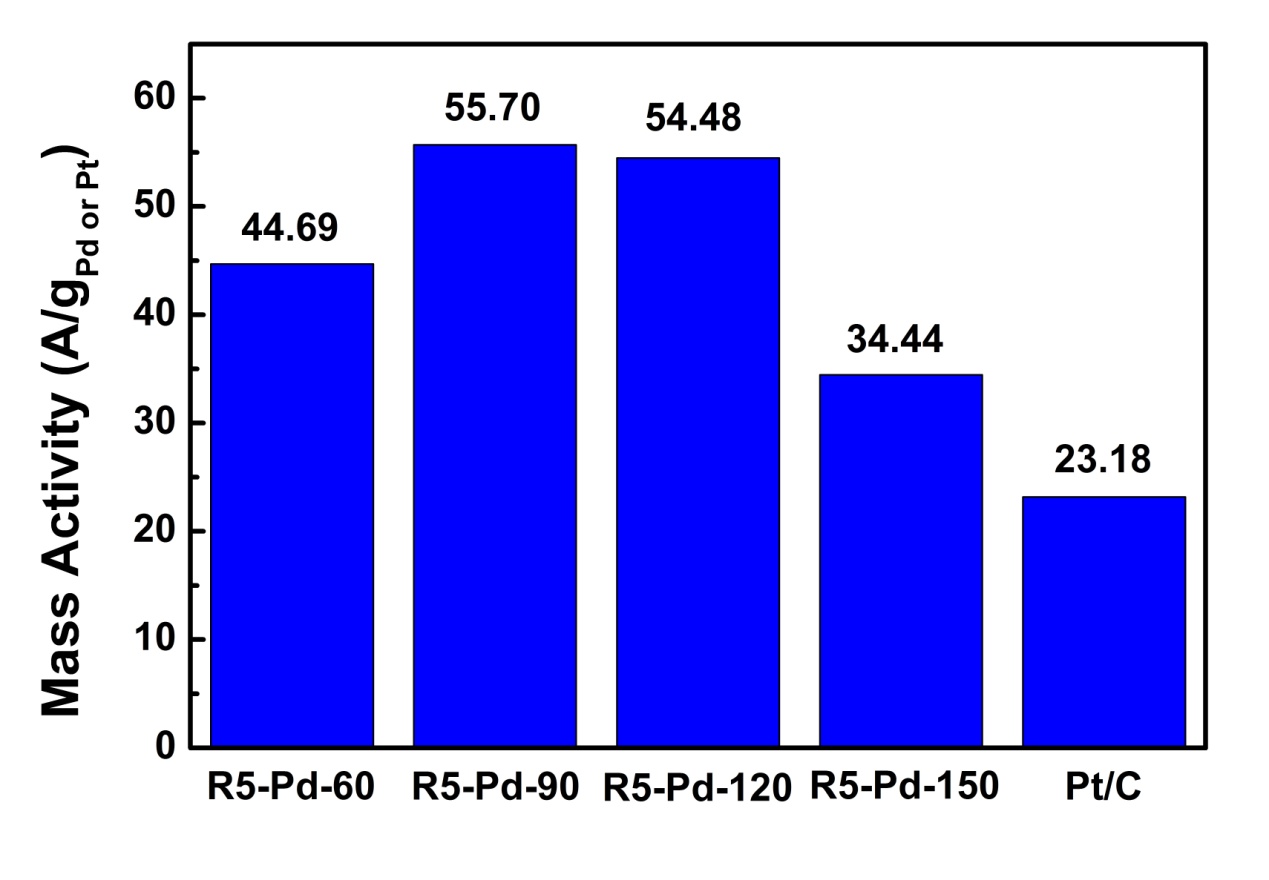


**Figure S7.** The mass activity comparison (calculated at 0.9 V vs. RHE) of R5-Pd-60, R5-Pd-90, R5-Pd-120, R5-Pd-150 and Pt/C.
